# Supplementary material
Source: HighWire-hosted journal article supplement (https://www.cmaj.ca/highwire/filestream/59204/field_highwire_adjunct_files/3/hpv-smith-4-at.pdf)
Supplement: hpv-smith-4-at.pdf [file hpv-smith-4-at.pdf]

---

**Appendix 4 (as supplied by the authors): Outcome Definition**

---

| <b>Outcome</b>                                 | <b>OHIP codes</b>           | <b>ICD-10 codes</b>                                                            | <b>Description</b>                                                                                      |
|------------------------------------------------|-----------------------------|--------------------------------------------------------------------------------|---------------------------------------------------------------------------------------------------------|
| <b>Clinical indicators of sexual behaviour</b> | <b>Non-HPV-related STIs</b> | 097, 098, 099<br>A51-A60,<br>A638, A64                                         | Syphilis, gonococcal infections, or “other” venereal diseases (e.g., herpes, chlamydia, trichomoniasis) |
|                                                | <b>Pregnancy</b>            | 632-635, 640-646, 650-653, 656, 658, 660-662<br>000-008, 010-048, 060, 080-084 | Pregnancy, spontaneous abortion, therapeutic abortion, or delivery                                      |

OHIP: Ontario Health Insurance Plan; ICD-10 = International Classification of Diseases, version 10;  
STIs: sexually transmitted infections

---
